# Supplementary figures and images for: High-throughput Oxford Nanopore sequencing-based approach for the multilocus sequence typing analysis of large-scale avian Escherichia coli study in Mississippi
Source: PubMed Central journal article supplement — Poult Sci. 2024 Jul 6;103(10):104067. doi: 10.1016/j.psj.2024.104067 (PMC11338106; doi:10.1016/j.psj.2024.104067), 2024-07-06

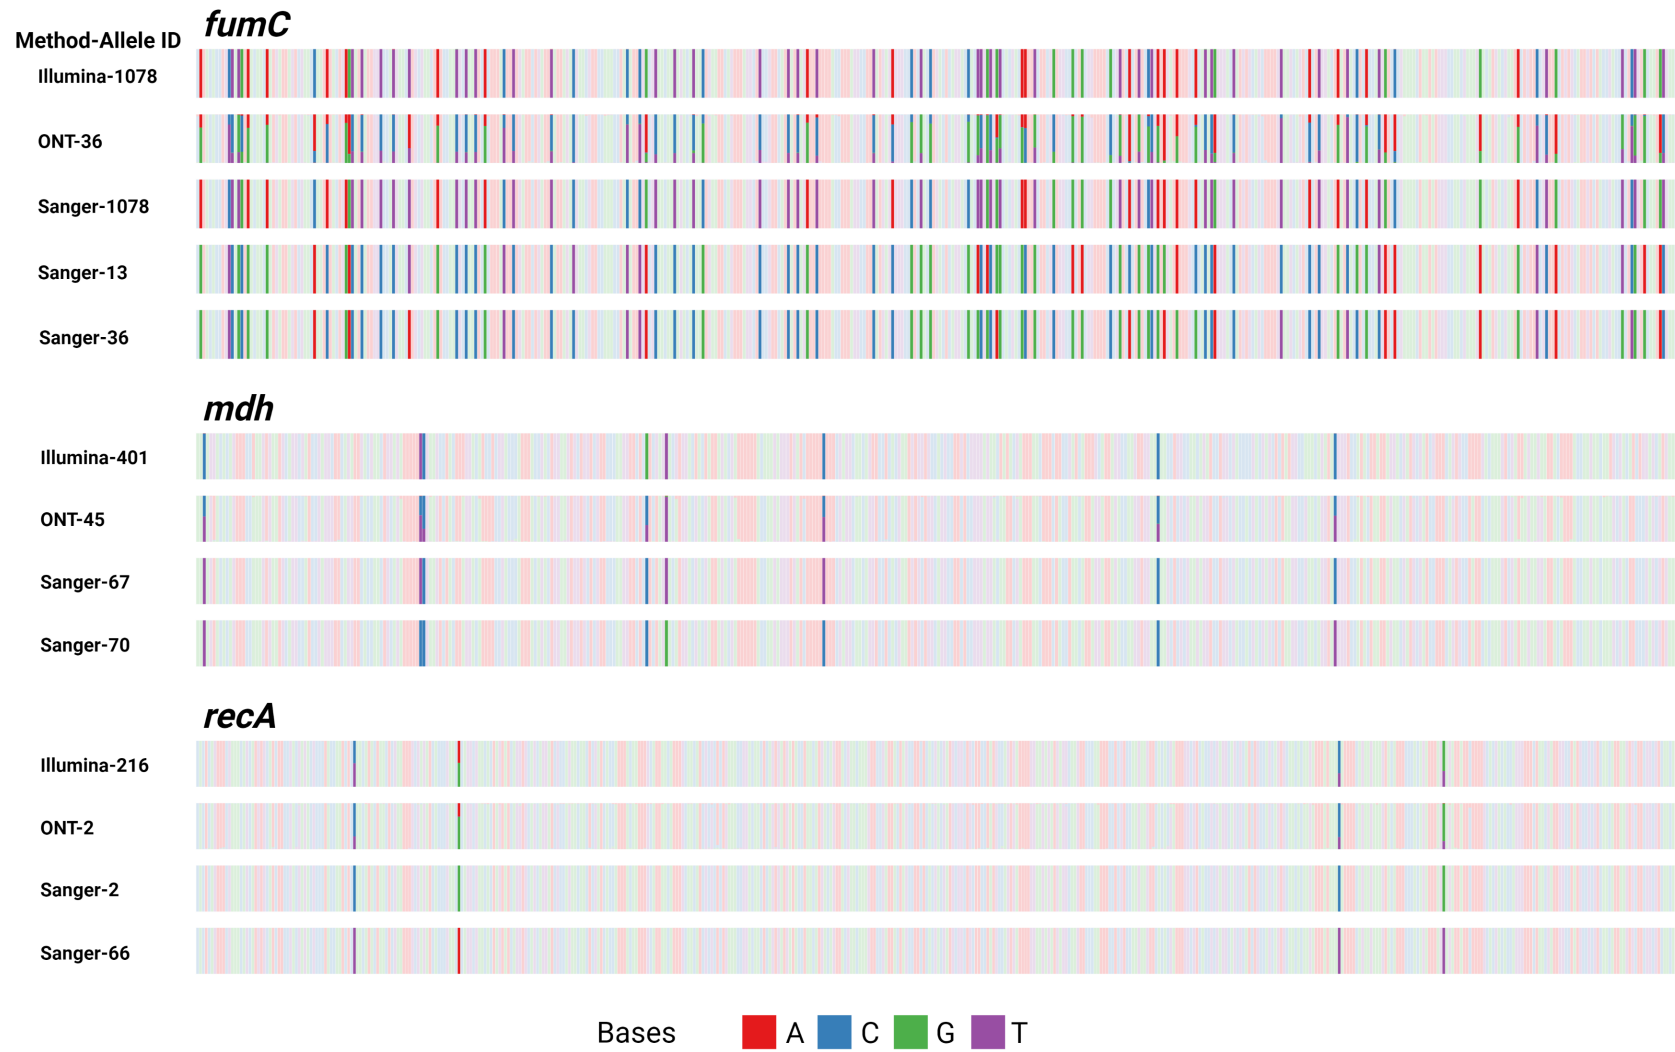

Supplement: mmc2.pdf [file mmc2.pdf]

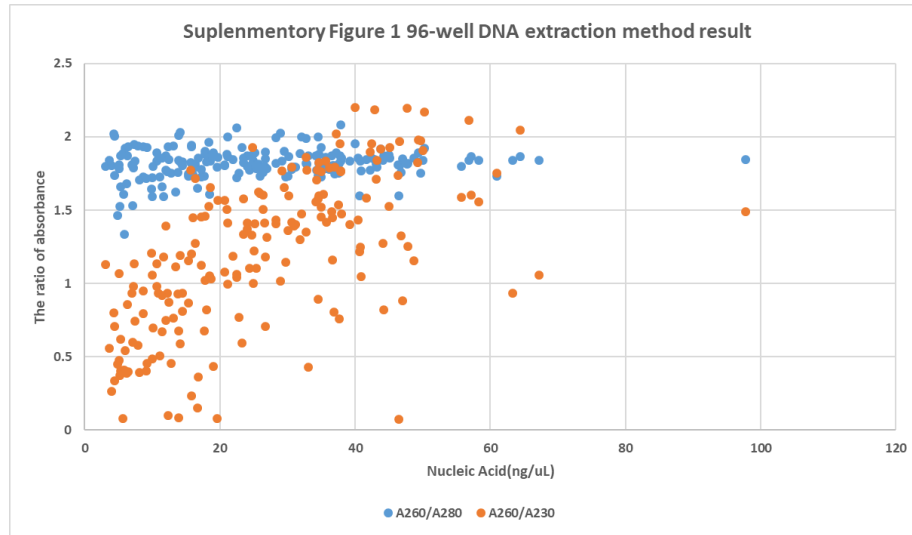

Supplement: mmc3.pdf [file mmc3.pdf]
